# Supplementary material for: Double perovskite Cs2NaInCl6 nanocrystals with intense dual-emission via self-trapped exciton-to-Tb3+ dopant energy transfer
Source: Royal Society of Chemistry journal article supplement (doi:10.1039/d2tc01067d), 2022-01-01
Supplement: d2tc01067d1.pdf [file d2tc01067d1.pdf]

Electronic supplementary information

**Double perovskite Cs<sub>2</sub>NaInCl<sub>6</sub> nanocrystals with intense dual-emission via self-trapped exciton to Tb<sup>3+</sup> dopant energy transfer**

Huwei Li,<sup>ab</sup> Long Tian,<sup>b</sup> Zhan Shi,<sup>a</sup> Yao Li,<sup>bc</sup> Chengyu Li,<sup>bc</sup> Jing Feng,<sup>\*bc</sup> and Hongjie Zhang<sup>\*bcde</sup>

<sup>a</sup> *State Key Laboratory of Inorganic Synthesis and Preparative Chemistry, College of Chemistry, Jilin University, Changchun 130012, China*

<sup>b</sup> *State Key Laboratory of Rare Earth Resource Utilization, Changchun Institute of Applied Chemistry, Chinese Academy of Sciences, Changchun 130022, China. E-mail: fengj@ciac.ac.cn, hongjie@ciac.ac.cn.*

<sup>c</sup> *University of Science and Technology of China, Hefei 230026, China*

<sup>d</sup> *Department of Chemistry, Tsinghua University, Beijing 100084, China*

<sup>e</sup> *Guangdong Guangna Huiming Technology Limited Company, The GBA National Institute for Nanotechnology Innovation, Guangzhou, China*

*\* Corresponding authors.*

*E-mail addresses: fengj@ciac.ac.cn (J. Feng), hongjie@ciac.ac.cn (H. Zhang).*

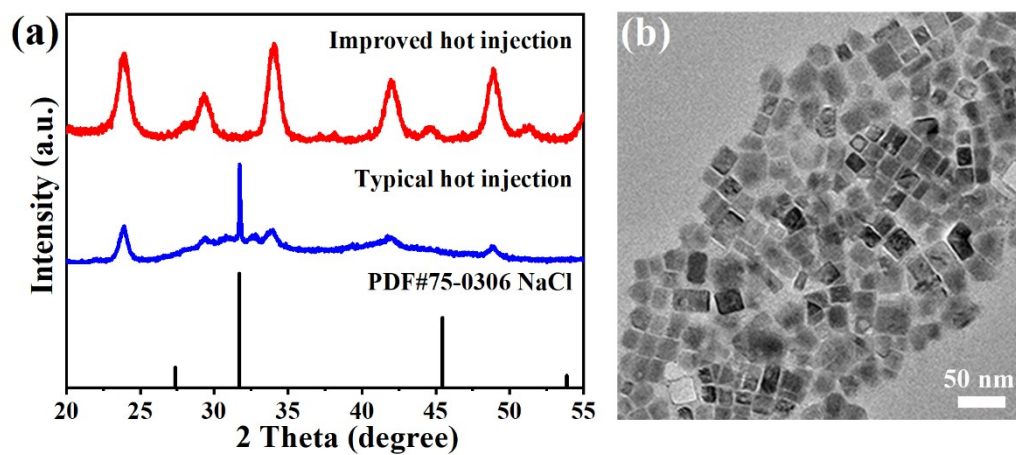

**Fig. S1** (a) XRD patterns of Cs<sub>2</sub>NaInCl<sub>6</sub> NCs prepared by typical hot injection compared with these synthesized by improved hot injection. (b) TEM image of Cs<sub>2</sub>NaInCl<sub>6</sub> NCs prepared by typical hot injection, showing irregular morphology.

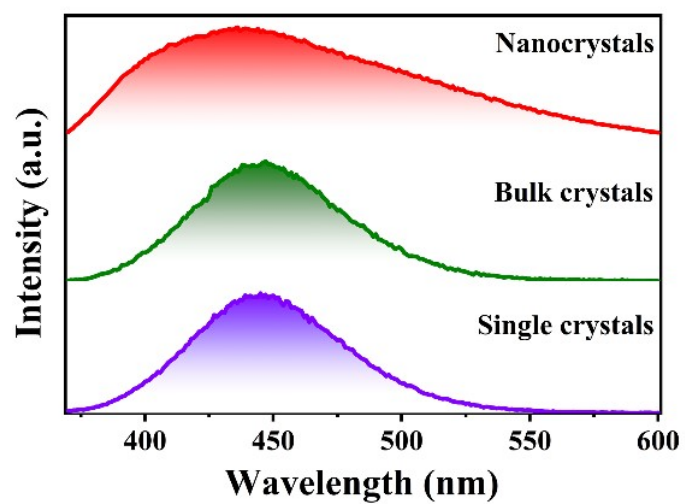

**Fig. S2** PL spectra of Cs<sub>2</sub>NaInCl<sub>6</sub> nanocrystals, bulk crystals, and single crystals (excited at 320 nm).

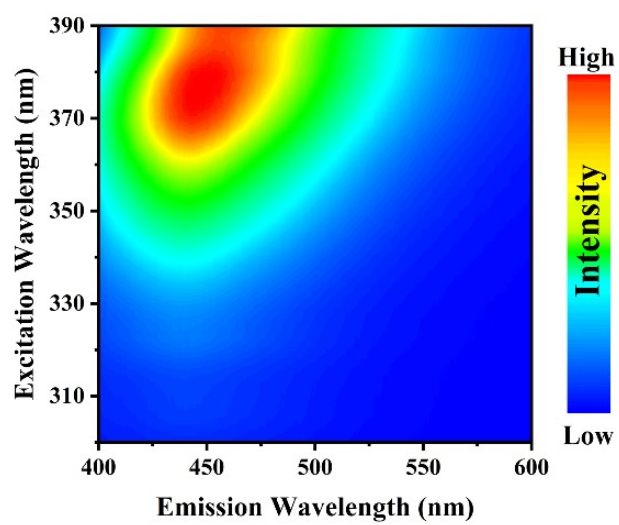

**Fig. S3** Excitation-emission color map of surface ligand.

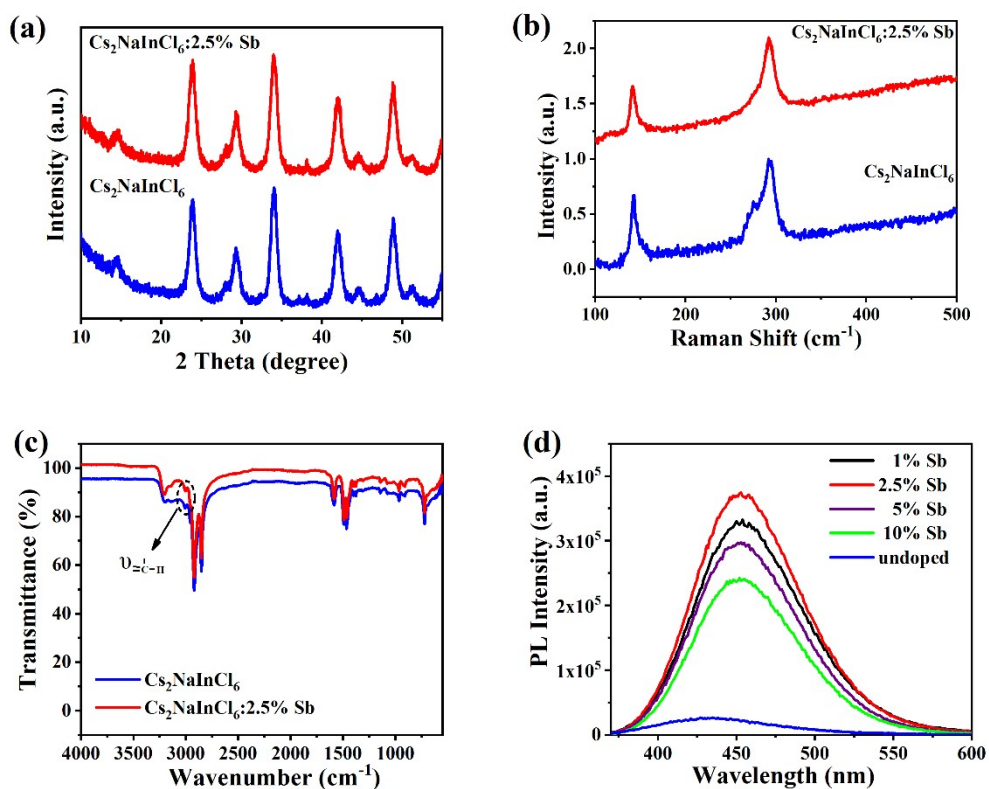

**Fig. S4** (a) XRD patterns of  $\text{Cs}_2\text{NaInCl}_6$  and  $\text{Cs}_2\text{NaInCl}_6:2.5\%\text{Sb}$  NCs. (b) Raman spectra of  $\text{Cs}_2\text{NaInCl}_6$  and  $\text{Cs}_2\text{NaInCl}_6:2.5\%\text{Sb}$  NCs collected at 532 nm green laser source. The peaks at 292 and 142  $\text{cm}^{-1}$  can be corresponded to the stretching ( $A_{1g}$ ) and bending ( $T_{2g}$ ) modes of  $[\text{InCl}_6]^{3-}$  octahedron, respectively. (c) FT-IR spectra of  $\text{Cs}_2\text{NaInCl}_6$  and  $\text{Cs}_2\text{NaInCl}_6:2.5\%\text{Sb}$  NCs. It could be observed that the characteristic peak of the cis-unsaturated  $=\text{C}-\text{H}$  stretching vibration in OA and OAm at 3006  $\text{cm}^{-1}$  for both  $\text{Cs}_2\text{NaInCl}_6$  and  $\text{Cs}_2\text{NaInCl}_6:2.5\%\text{Sb}$  NCs. (d) PL spectra (excited by 335 nm) of undoped and Sb-doped  $\text{Cs}_2\text{NaInCl}_6$  NCs, as framed in the figures.

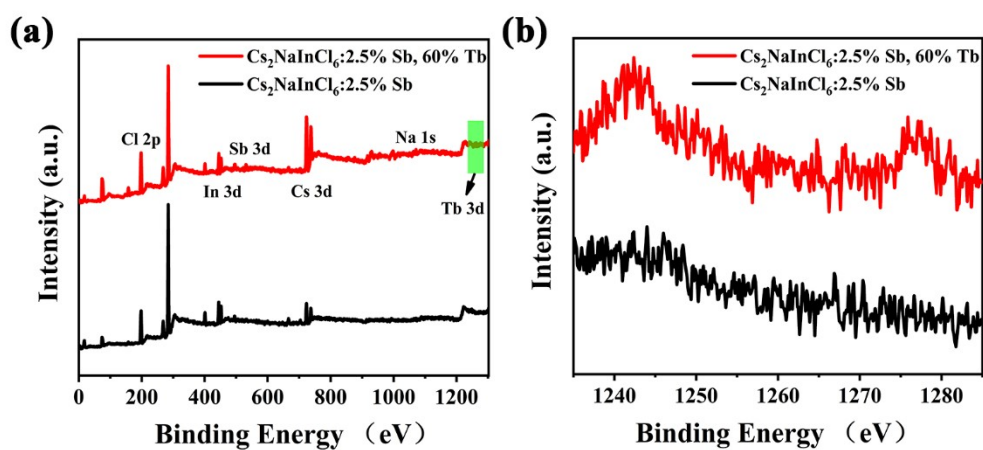

**Fig. S5** (a) Survey XPS spectra of  $\text{Cs}_2\text{NaInCl}_6:2.5\%\text{Sb}$  and  $\text{Cs}_2\text{NaInCl}_6:2.5\%\text{Sb},60\%\text{Tb}$  NCs. (b) High-resolution XPS spectrum of Tb 3d in  $\text{Cs}_2\text{NaInCl}_6:2.5\%\text{Sb},60\%\text{Tb}$ .

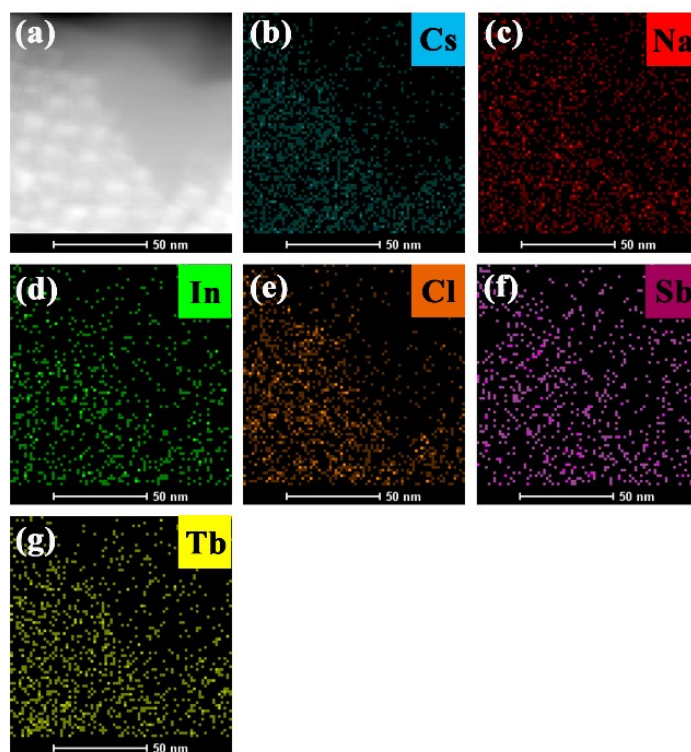

**Fig. S6** (a) High-angle annular dark-field (HAADF) image of  $\text{Cs}_2\text{NaInCl}_6:2.5\%\text{Sb},60\%\text{Tb}$  NCs. (b-g) STEM-EDS elemental mappings of  $\text{Cs}^+$ ,  $\text{Na}^+$ ,  $\text{In}^{3+}$ ,  $\text{Cl}^-$ ,  $\text{Sb}^{3+}$ ,  $\text{Tb}^{3+}$  colocalized in  $\text{Cs}_2\text{NaInCl}_6:2.5\%\text{Sb},60\%\text{Tb}$  NCs.

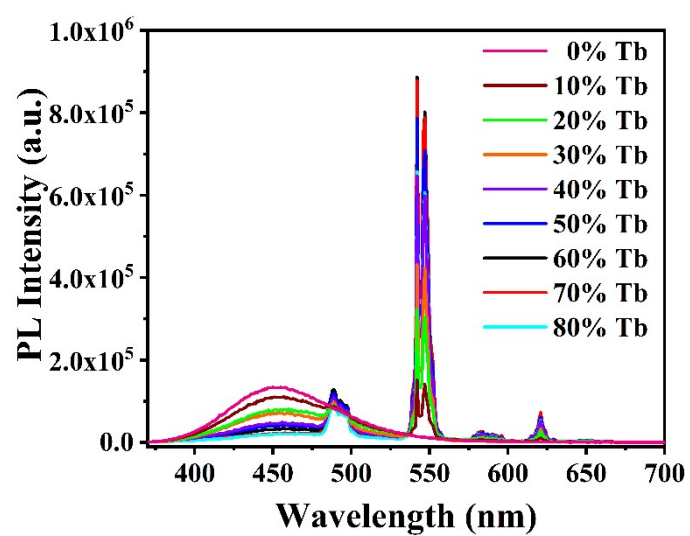

**Fig. S7** PL spectra of Cs<sub>2</sub>NaInCl<sub>6</sub>:2.5%Sb,(0%-80%)Tb NCs excited at 335 nm, as framed in the figure.



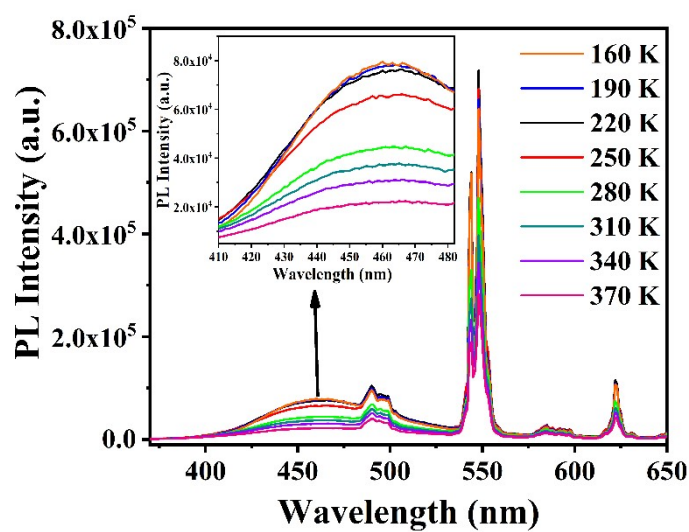

**Fig. S8** PL spectra of  $\text{Cs}_2\text{NaInCl}_6:2.5\%\text{Sb},30\%\text{Tb}$  NCs at different temperature. With the increase of temperature, the STEs emission gradually decrease. While the intensity of  $\text{Tb}^{3+}$  ions emission is enhanced as the temperature increases from 160 K to 220 K, and then weakens when the temperature increases from 220 K to 370 K.

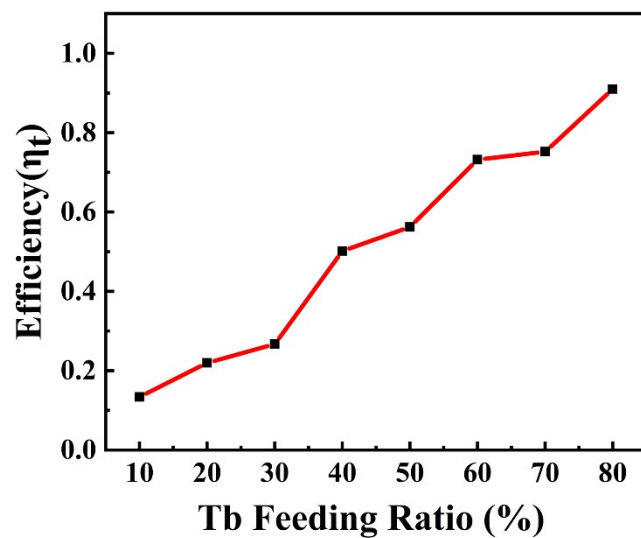

**Fig. S9** The energy transfer efficiency variation of  $\text{Cs}_2\text{NaInCl}_6:2.5\%\text{Sb},(10\%-80\%)\text{Tb}$  (monitored at 450 nm) under excitation at 335 nm as a function of Tb feeding ratio.

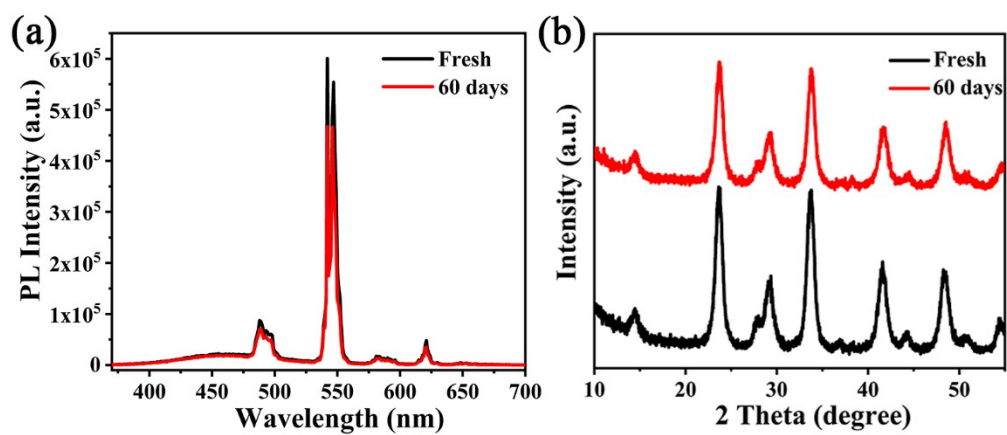

**Fig. S10** (a) PL spectra and (b) XRD patterns of fresh  $\text{Cs}_2\text{NaInCl}_6:2.5\%\text{Sb},60\%\text{Tb}$  NCs (black) and  $\text{Cs}_2\text{NaInCl}_6:2.5\%\text{Sb},60\%\text{Tb}$  NCs stored in air for 60 days (red).

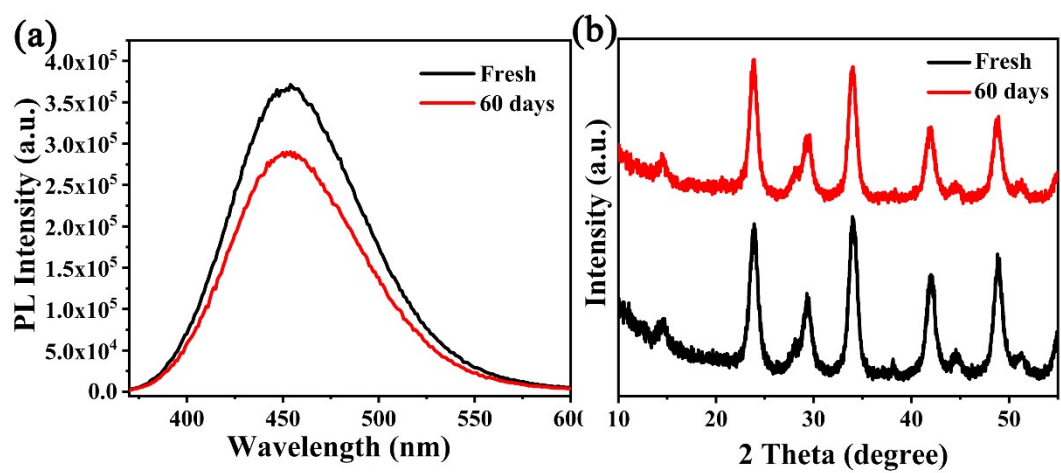

**Fig. S11** (a) PL spectra and (b) XRD patterns of fresh  $\text{Cs}_2\text{NaInCl}_6:2.5\%\text{Sb}$  NCs (black) and  $\text{Cs}_2\text{NaInCl}_6:2.5\%\text{Sb}$  NCs stored in air for 60 days (red).

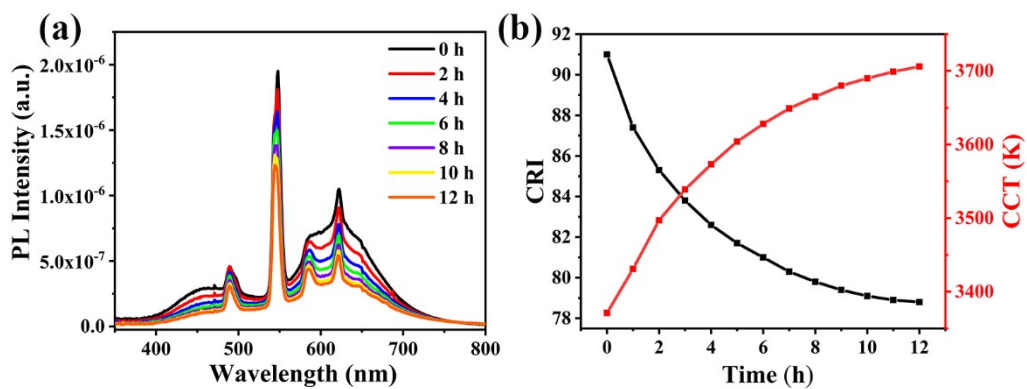

**Fig. S12** (a) Evolution of PL spectra of WLED device after different running periods at the same bias and measurement conditions (at 20 mA). (b) CRI and CCT of the WLED measured at different working time.

---

**Table S1.** Inductively coupled plasma optical emission spectrometer (ICP-OES) data of Cs<sub>2</sub>NaInCl<sub>6</sub>:Sb,Tb NCs.

| Feeding ratios x of<br>Tb/(Tb+Sb+In)×100% | Tb/(Tb+Sb+In) ratios<br>measured by ICP | Sb/(Sb+In) ratios<br>measured by ICP |
|-------------------------------------------|-----------------------------------------|--------------------------------------|
| 0%                                        | 0%                                      | 1.1%                                 |
| 10%                                       | 1.9%                                    | 1.3%                                 |
| 20%                                       | 9.0%                                    | 1.3%                                 |
| 30%                                       | 13.1%                                   | 1.4%                                 |
| 40%                                       | 25.7%                                   | 1.3%                                 |
| 50%                                       | 31.5%                                   | 1.4%                                 |
| 60%                                       | 43.6%                                   | 1.4%                                 |
| 70%                                       | 49.0%                                   | 1.5%                                 |
| 80%                                       | 52.4%                                   | 1.5%                                 |

**Table S2.** Comparison of PLQY of reported lead-free perovskite NCs with that of this work.

| Lead-free perovskite NCs                                                       | PLQY (%) | Reference |
|--------------------------------------------------------------------------------|----------|-----------|
| Cs <sub>2</sub> NaInCl <sub>6</sub> :2.5%Sb, 60%Tb                             | 74%      | This work |
| Cs <sub>2</sub> NaInCl <sub>6</sub> :10%Ag                                     | 31.1%    | 30        |
| Cs <sub>2</sub> AgInCl <sub>6</sub> :1%Bi                                      | 11.4%    | 29        |
| Cs <sub>2</sub> NaBiCl <sub>6</sub>                                            | ~16%     | 10        |
| Bi-doped Cs <sub>2</sub> Ag <sub>0.4</sub> Na <sub>0.6</sub> InCl <sub>6</sub> | ~22%     | 14        |
| Cs <sub>2</sub> NaBiCl <sub>6</sub> :14%Mn                                     | 3.9%     | 34        |

**Table S3.** Inductively coupled plasma optical emission spectrometer (ICP-OES) data of Cs<sub>2</sub>NaInCl<sub>6</sub>:2.5%Sb,45%Tb,3%Mn NCs.

| Tb/(Tb+Sb+In+Mn) ratios | Mn/(Tb+Sb +In+Mn) ratios | Sb/(Sb+In) ratios |
|-------------------------|--------------------------|-------------------|
| 34.3%                   | 1.4%                     | 1.6%              |
